# Supplementary material for: Traction microscopy with integrated microfluidics: responses of the multi-cellular island to gradients of HGF
Source: Royal Society of Chemistry journal article supplement (doi:10.1039/c9lc00173e), 2019-01-01

## Traction microscopy with integrated microfluidics: responses of the multi-cellular island to gradients of HGF

Hwanseok Jang,<sup>‡a</sup> Jongseong Kim,<sup>‡a</sup> Jennifer H. Shin,<sup>b</sup> Jeffrey J. Fredberg,<sup>c</sup> Chan Young Park<sup>\*c</sup> and Yongdoo Park<sup>\*a</sup>

<sup>a</sup> Department of Biomedical Sciences, College of Medicine, Korea University, Seoul 02841, Republic of Korea.

<sup>b</sup> Department of Mechanical Engineering, Korea Advanced Institute of Science and Technology, Daejeon 34141, Republic of Korea.

<sup>c</sup> Department of Environmental Health, Harvard School of Public Health, Boston, MA 02115, USA.

<sup>‡</sup>These authors (H. Jang and J. Kim) contributed equally to this work.

<sup>\*</sup>To whom correspondence should be addressed:

[cypark@hsph.harvard.edu](mailto:cypark@hsph.harvard.edu) and [ydpark67@korea.ac.kr](mailto:ydpark67@korea.ac.kr)

### SUPPORTING INFORMATION

**Movie 1.** (a) Concentration gradient visualized by fluorescence intensities of Rhodamine-conjugated dextran which has a similar molecular weight with HGF (70 kDa). (b) Bright field images of MDCK cell islands and their expansion responding to HGF concentration for 500 min.

**Figure S1.** Concentration gradients depending on flow rate and gradient stability over time. (a) Gradients visualized by fluorescence images of Rhodamine-conjugated dextran (70 kDa) introduced at the left channel under 0.1  $\mu\text{l}/\text{min}$  or 0.5  $\mu\text{l}/\text{min}$  of fluid flow. (b) The intensity profiles of the fluorescence images under 0.1  $\mu\text{l}/\text{min}$  or 0.5  $\mu\text{l}/\text{min}$  of fluid flow. (c) Variation of concentration difference over time in each column in the box shown in Fig. 2b.

**Figure S2.** Variability of speed, traction, and tension of 4 separate experiments. Each red dot is the average of ratios between left half and right half of an island in each left, middle and right columns. Each column has 6 islands. Green line and red line indicate the mean and median value of these red dots, respectively. (a) speed. (b) the magnitude of traction. (c) the magnitude of tension.

**a**

0 min

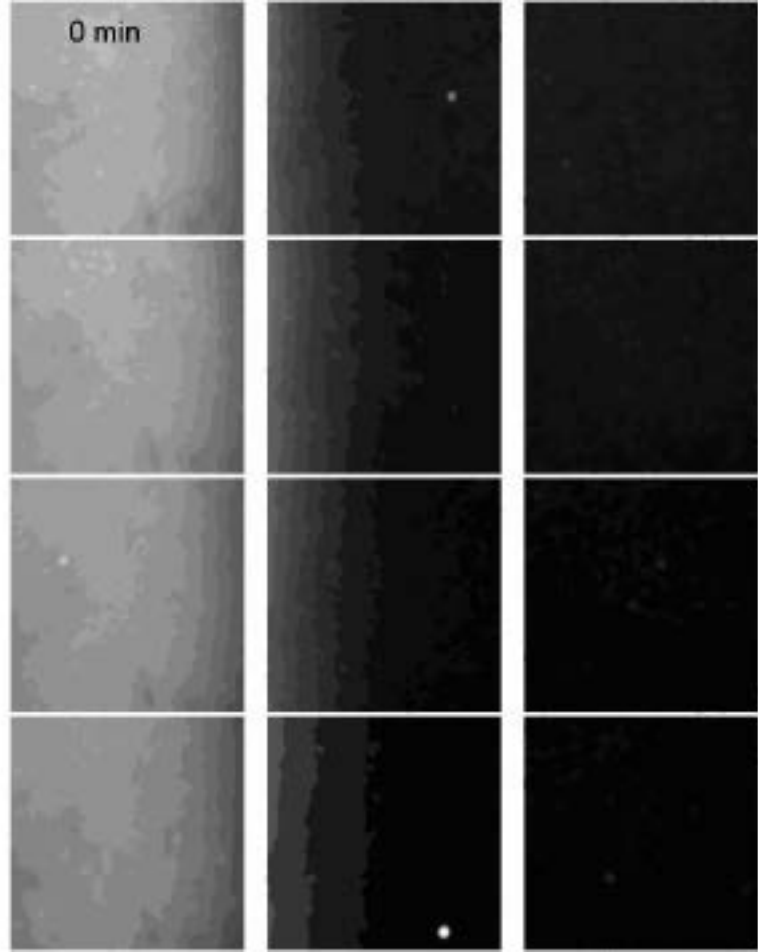**b**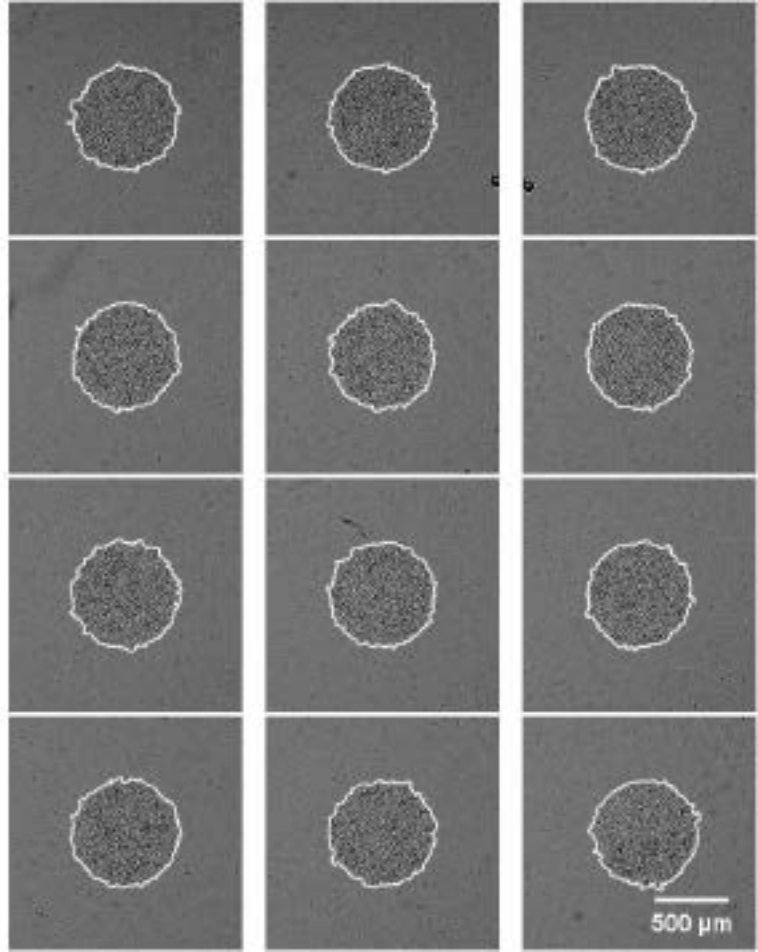

**a**

Fluorescent image of rhodamine-dextran (70 kDa)

0.1  $\mu\text{l}/\text{min}$ 0.5  $\mu\text{l}/\text{min}$ 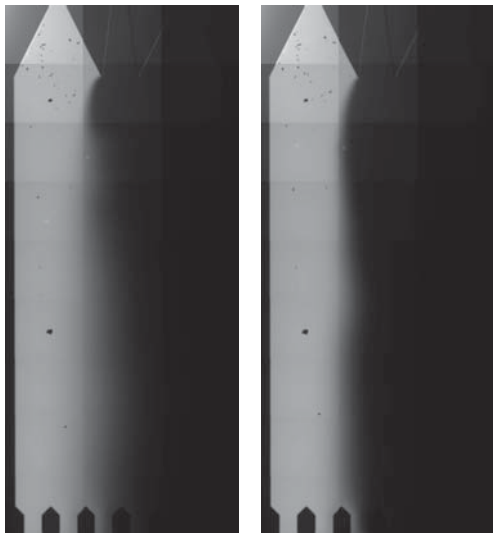**b**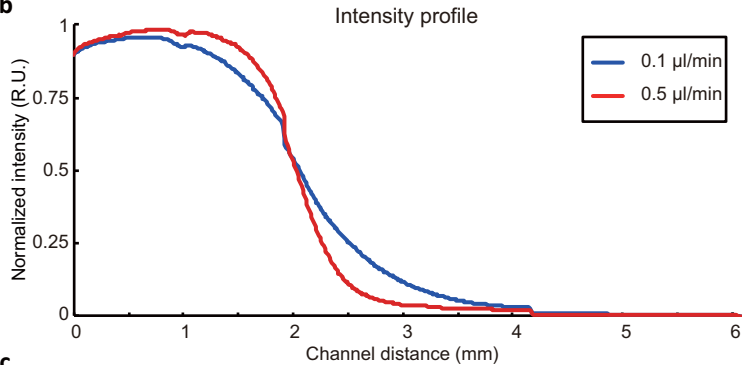**c**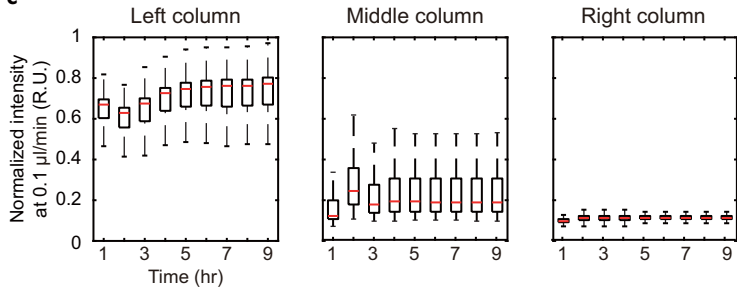

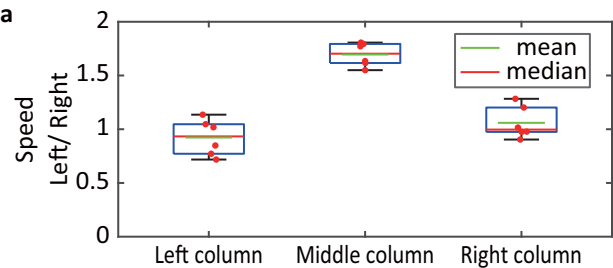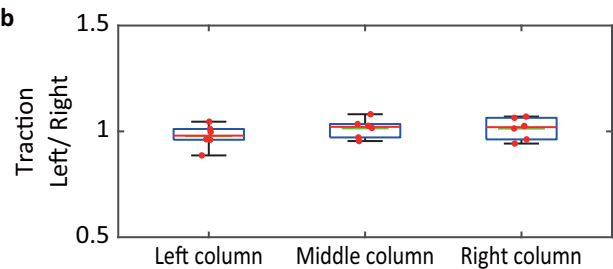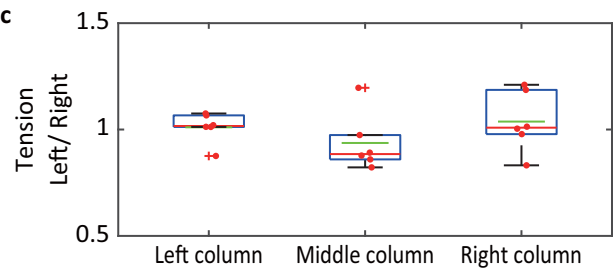

Supplement: c9lc00173e1.pdf [file c9lc00173e1.pdf]
